# Supplementary material
Source: PubMed Central journal article supplement (PMC4458812)
Supplement: SD1.pdf [file SD1.pdf]

SUPPLEMENTAL TABLE 1  
Association between household soil measurements and fecal EE markers (N = 128 households)

| Outcome                    | Presence of pathogenic <i>Escherichia coli</i> in household soil coefficient (95% CI) |                                | Household <i>E. coli</i> soil counts OR (95% CI)* |                              |
|----------------------------|---------------------------------------------------------------------------------------|--------------------------------|---------------------------------------------------|------------------------------|
|                            | Age adjusted                                                                          | Fully adjusted†                | Age adjusted (Q1 vs. Q4)                          | Fully adjusted‡ (Q1 vs. Q4)  |
| Calprotectin (µg/g)        | -113.97 (-497.09, 269.16)                                                             | -100.21 (-486.06, 285.65)      | -41.00 (-402.44, 320.43)                          | -35.24 (-394.16, 323.67)     |
| EE score                   | 1.08 (0.002, 2.15)‡                                                                   | 1.08 (-0.004, 2.16)            | -0.0136 (-1.05, 1.02)                             | -0.03 (-1.06, 1.00)          |
| Alpha-1-antitrypsin (mg/g) | 0.10 (-0.10, 0.31)                                                                    | 0.09 (-0.11, 0.30)             | 0.0008 (-0.19, 0.19)                              | -0.0001 (-0.18, 0.18)        |
| Myeloperoxidase (ng/mL)    | 4,234.66 (1,140.04, 7,329.29)‡                                                        | 4,324.24 (1,215.51, 7,432.97)‡ | 574.79 (-2,367.17, 3,516.74)                      | 586.86 (-2,327.44, 3,501.15) |
| Neopterin (nmol/L)         | 2,038.88 (779.41, 3,298.35)‡                                                          | 2,165.63 (917.23, 3,414.02)‡   | 461.51 (-728.00, 1,651.01)                        | 469.98 (-698.53, 1,638.51)   |

CI = confidence interval; EE = environmental enteropathy; OR = odds ratio.

\* Mean *E. coli* count for households and odds ratio compares the first to the fourth quartile.

† Fully adjusted models adjust for age, age squared, caregiver educational level, and family size.

‡ P value < 0.05.

SUPPLEMENTAL TABLE 2

Association between anthropometric measurements and fecal markers of EE at 9-month follow-up (*N* = 205)

| Fecal markers              | <i>N</i> | Proportion WAZ < -2 OR (95% CI) |                     | Proportion HAZ < -2 OR (95% CI) |                   | Proportion WHZ < -2 OR (95% CI) |                    |
|----------------------------|----------|---------------------------------|---------------------|---------------------------------|-------------------|---------------------------------|--------------------|
|                            |          | Age adjusted                    | Fully adjusted*     | Age adjusted                    | Fully adjusted*   | Age adjusted                    | Fully adjusted*    |
| Calprotectin (µg/g)        |          |                                 |                     |                                 |                   |                                 |                    |
| 31–189                     | 51       | Referent                        | Referent            | Referent                        | Referent          | Referent                        | Referent           |
| 190–392                    | 52       | 1.04 (0.40, 2.72)               | 1.05 (0.39, 2.82)   | 1.87 (0.77, 4.50)               | 2.25 (0.88, 5.74) | 2.73 (0.27, 27.37)              | 3.34 (0.32, 34.45) |
| 393–813                    | 51       | 1.71 (0.67, 4.38)               | 1.72 (0.65, 4.56)   | 1.86 (0.75, 4.63)               | 2.18 (0.83, 5.75) | 6.40 (0.74, 55.37)              | 7.73 (0.86, 69.98) |
| 814–5,174                  | 51       | 1.21 (0.43, 3.40)               | 1.27 (0.45, 3.59)   | 2.02 (0.77, 5.27)               | 2.25 (0.83, 6.10) | 2.12 (0.20, 22.77)              | 2.56 (0.24, 27.81) |
| EE score                   |          |                                 |                     |                                 |                   |                                 |                    |
| 0–3                        | 58       | Referent                        | Referent            | Referent                        | Referent          | Referent                        | Referent           |
| 4                          | 34       | 1.00 (0.30, 3.33)               | 1.02 (0.31, 3.42)   | 1.60 (0.64, 4.02)               | 1.62 (0.63, 4.17) | †                               | †                  |
| 5–6                        | 54       | 2.60 (0.99, 6.84)               | 2.55 (0.97, 6.73)   | 1.81 (0.79, 4.14)               | 1.79 (0.77, 4.15) | 2.56 (0.46, 14.25)              | 2.60 (0.47, 14.53) |
| 7–10                       | 59       | 3.74 (1.38, 10.15)‡             | 3.73 (1.38, 10.12)‡ | 1.30 (0.54, 3.13)               | 1.32 (0.54, 3.22) | 3.13 (0.57, 17.25)              | 3.18 (0.57, 17.73) |
| Alpha-1-antitrypsin (mg/g) |          |                                 |                     |                                 |                   |                                 |                    |
| 0.02–0.15                  | 53       | Referent                        | Referent            | Referent                        | Referent          | Referent                        | Referent           |
| 0.16–0.25                  | 47       | 1.45 (0.52, 4.00)               | 1.50 (0.53, 4.22)   | 1.24 (0.53, 2.91)               | 1.18 (0.49, 2.84) | 3.21 (0.32, 32.26)              | 3.77 (0.36, 39.56) |
| 0.26–0.50                  | 53       | 1.48 (0.54, 4.04)               | 1.44 (0.52, 4.02)   | 0.80 (0.33, 1.93)               | 0.76 (0.31, 1.88) | 2.67 (0.26, 27.08)              | 2.84 (0.27, 29.70) |
| 0.51–2.2                   | 52       | 3.11 (1.18, 8.17)‡              | 3.17 (1.19, 8.43)‡  | 1.44 (0.62, 3.37)               | 1.42 (0.59, 3.39) | 6.66 (0.76, 58.12)              | 7.41 (0.83, 66.49) |
| Myeloperoxidase (ng/mL)    |          |                                 |                     |                                 |                   |                                 |                    |
| 216–1,970                  | 52       | Referent                        | Referent            | Referent                        | Referent          | Referent                        | Referent           |
| 1,971–3,562                | 52       | 1.63 (0.62, 4.29)               | 1.57 (0.59, 4.16)   | 0.89 (0.38, 2.11)               | 0.95 (0.40, 2.29) | 4.42 (0.48, 40.69)              | 4.39 (0.47, 40.92) |
| 3,592–5,980                | 48       | 1.50 (0.54, 4.16)               | 1.50 (0.54, 4.18)   | 1.01 (0.42, 2.46)               | 1.10 (0.45, 2.73) | 3.62 (0.37, 30.24)              | 4.13 (0.42, 40.27) |
| 5,981–41,369               | 53       | 1.93 (0.70, 5.37)               | 1.92 (0.69, 5.32)   | 1.08 (0.44, 2.66)               | 1.16 (0.46, 2.88) | 2.98 (0.30, 30.08)              | 3.21 (0.32, 32.35) |
| Neopterin (nmol/L)         |          |                                 |                     |                                 |                   |                                 |                    |
| 2–558                      | 52       | Referent                        | Referent            | Referent                        | Referent          | Referent                        | Referent           |
| 559–1,504                  | 51       | 0.70 (0.25, 1.91)               | 0.74 (0.27, 2.05)   | 0.71 (0.30, 1.66)               | 0.64 (0.26, 1.54) | †                               | †                  |
| 1,507–3,007                | 51       | 1.03 (0.40, 2.64)               | 1.12 (0.42, 2.97)   | 0.50 (0.20, 1.24)               | 0.40 (0.15, 1.03) | 1.67 (0.37, 7.50)               | 1.81 (0.39, 8.54)  |
| 3,008–16,486               | 51       | 2.07 (0.86, 5.00)               | 2.17 (0.87, 5.38)   | 1.86 (0.83, 4.14)               | 1.57 (0.69, 3.59) | 2.02 (0.47, 8.66)               | 1.91 (0.43, 8.56)  |

CI = confidence interval; EE = environmental enteropathy; HAZ = length/height-for-age z-score; OR = odds ratio; WAZ = weight-for-age z-score; WHZ = weight-for-length/height z-score.

Fully adjusted models adjust for age, age squared, caregiver educational level, and family size.

†The maximum likelihood is not estimable because no wasted children in category.

‡*P* value < 0.05.
